# Supplementary material for: High serum gamma-glutamyl transpeptidase concentration associates with poor postoperative prognosis of patients with hepatitis B virus-associated intrahepatic cholangiocarcinoma
Source: PubMed Central journal article supplement — Ann Transl Med. 2021 Jan;9(1):17. doi: 10.21037/atm-20-1616 (PMC7859769; doi:10.21037/atm-20-1616), 2021-01
Supplement: atm-09-01-17-supplementary.pdf [file atm-09-01-17-supplementary.pdf]

**Table S1** Univariate Cox regression analyses of risk factors related to OS and TTR in 107 patients

| Variables                                                   | OS                  |         | TTR                 |         |
|-------------------------------------------------------------|---------------------|---------|---------------------|---------|
|                                                             | Odds ratio (95% CI) | P value | Odds ratio (95% CI) | P value |
| Age, years, ≤50 vs. >50                                     | 0.72 (0.46, 1.12)   | 0.146   | 0.69 (0.45, 1.07)   | 0.098   |
| TB, per SD                                                  | 0.98 (0.79, 1.21)   | 0.846   | 1.01 (0.83, 1.23)   | 0.916   |
| Prothrombin time (s)                                        | 1.16 (0.95, 1.43)   | 0.155   | 1.18 (0.97, 1.44)   | 0.093   |
| Serum albumin, per SD                                       | 0.78 (0.62, 0.99)   | 0.039*  | 0.72 (0.58, 0.91)   | 0.006*  |
| Glutamic pyruvic transaminase, per SD                       | 0.98 (0.80, 1.20)   | 0.830   | 1.00 (0.82, 1.21)   | 0.988   |
| GGT, per SD                                                 | 1.54 (1.27, 1.87)   | <0.001* | 1.53 (1.26, 1.86)   | <0.001* |
| Tumor size (cm)                                             | 1.05 (0.97, 1.13)   | 0.210   | 1.07 (0.99, 1.15)   | 0.082   |
| Sex (male vs. female)                                       | 1.45 (0.89, 2.35)   | 0.132   | 1.68 (1.04, 2.71)   | 0.035*  |
| Cirrhosis (positive vs. negative)                           | 1.35 (0.73, 2.51)   | 0.335   | 1.31 (0.71, 2.42)   | 0.386   |
| HBV DNA, copies/mL (>10 <sup>3</sup> vs. ≤10 <sup>3</sup> ) | 1.07 (0.61, 1.87)   | 0.824   | 1.11 (0.64, 1.92)   | 0.708   |
| CA19-9, u/mL (≤37 vs. >37)                                  | 1.02 (0.65, 1.59)   | 0.945   | 1.44 (0.92, 2.24)   | 0.108   |
| AFP, ng/ml (≤20 vs. >20)                                    | 1.30 (0.77, 2.18)   | 0.328   | 1.34 (0.80, 2.26)   | 0.262   |
| Tumor number (multiple vs. solitary)                        | 1.39 (0.60, 3.20)   | 0.438   | 1.15 (0.50, 2.65)   | 0.738   |
| Tumor location (single lobe vs. multiple lobes)             | 2.41 (1.38, 4.20)   | 0.002*  | 2.11 (1.21, 3.68)   | 0.008*  |
| Liver resection (anatomical vs. local)                      | 0.74 (0.46, 1.17)   | 0.196   | 0.76 (0.48, 1.19)   | 0.225   |
| Tumor capsule (positive vs. negative)                       | 0.74 (0.38, 1.43)   | 0.366   | 0.70 (0.36, 1.36)   | 0.296   |
| Micro thrombus invasion (yes vs. no)                        | 1.46 (0.86, 2.48)   | 0.157   | 2.02 (1.22, 3.36)   | 0.006*  |
| Hilar lymph nodes (negative vs. positive)                   | 1.13 (0.54, 2.35)   | 0.743   | 1.21 (0.58, 2.52)   | 0.607   |
| Histologic differentiation (well vs. poor)                  | 1.71 (1.08, 2.70)   | 0.022*  | 1.71 (1.09, 2.68)   | 0.019*  |
| Adjuvant chemotherapy (yes vs. no)                          | 0.86 (0.54, 1.36)   | 0.510   | 1.04 (0.66, 1.63)   | 0.876   |

\*, Significant difference. OS, overall survival; TTR, time to recurrence; CI, confidence interval; TB, total bilirubin; SD, standard deviation; GGT, gamma-glutamyl transpeptidase; HBV, hepatitis B virus; CA19-9, carbohydrate antigen 19-9; AFP, alpha-fetoprotein.

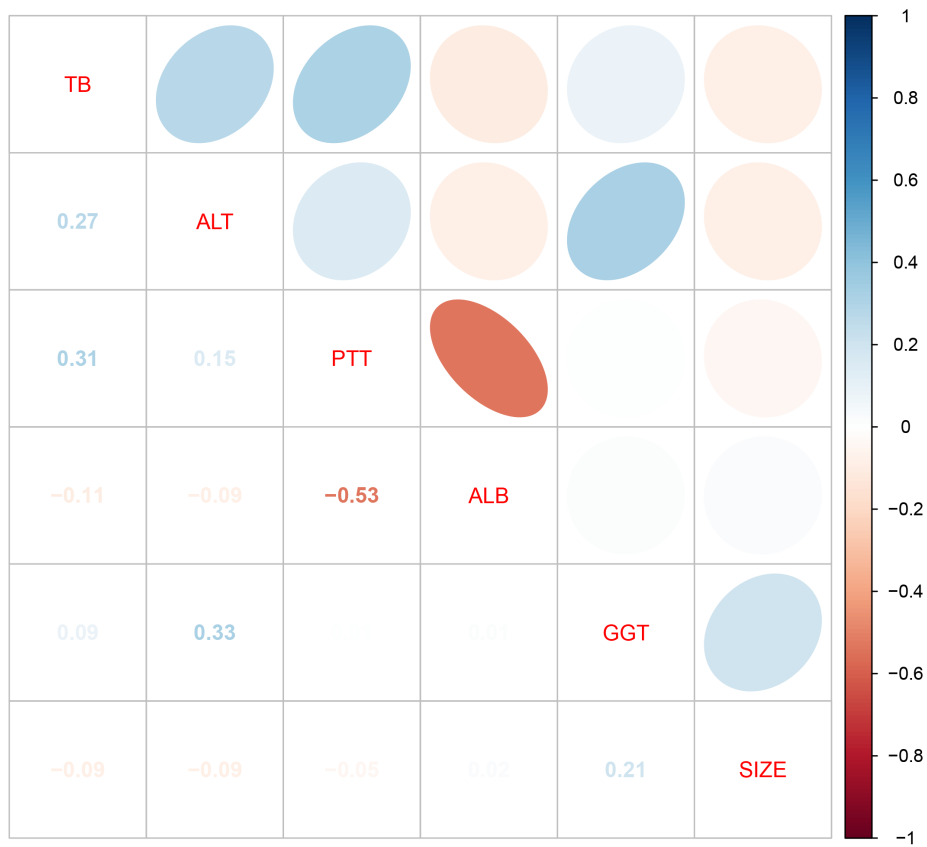

**Figure S1** Factors potentially correlated with serum GGT concentration. Correlation test showed that all of the P value of correlation for each pair are  $>0.05$ . Even ALT which is the most relevant factor of GGT, has a correlation coefficient of only 0.33. GGT, gamma-glutamyl transpeptidase; ALT, alanine aminotransferase; TB, total bilirubin.
